# Supplementary material
Source: Springer Nature journal article supplement (https://www.springermedizin.de/resource/supplementary/12961_2014_350_MOESM2_ESM.pdf/9571118)
Supplement: MOESM2 [file 9571118]

**Additional file 2:**

**Table S2 Secondary sources of information included in documentary analysis**

| Type                                                                                              | Source                                                                            |
|---------------------------------------------------------------------------------------------------|-----------------------------------------------------------------------------------|
| <b>National-level Policy 2000-2010</b>                                                            |                                                                                   |
| National Health Strategy 2001:<br>“Quality & Fairness; a Healthy System for you “ (279).          | Department of Health and Children (DOHC) 2001                                     |
| Primary Care Strategy 2001:<br>“Primary Care: A New Direction” (182)                              | DOHC 2001                                                                         |
| “Tackling Chronic Disease: A policy framework for the management of Chronic Disease.” (2008) (11) | DOHC 2008                                                                         |
| <b>Position Statements on Diabetes 2000-2010</b>                                                  |                                                                                   |
| “Diabetes: Prevention & Model for Patient Care” (2006).                                           | Diabetes Working Group established by DOHC in 2004                                |
| “Diabetes Care; Securing the Future” (2002)                                                       | Diabetes Service Development Group linked to Diabetes Federation of Ireland (DFI) |
| “Diabetes Federation of Ireland: The Way Forward 2006-2010”                                       | DFI Strategy Paper 2010                                                           |
| <b>EAG Process Documentation 2006-2010</b>                                                        |                                                                                   |
| Meeting Agendas                                                                                   | Online, health service administration, group members                              |
| Meeting Minutes                                                                                   |                                                                                   |
| Evaluation questionnaires of the process                                                          |                                                                                   |
| Copy of some presentations to the group                                                           |                                                                                   |
| Official press release from HSE                                                                   |                                                                                   |
| <b>Media 2006-2010</b>                                                                            |                                                                                   |
| HSE Press Releases                                                                                | Online                                                                            |
| Coverage in national newspapers, online health forums                                             |                                                                                   |
| <b>Other 2006-2010</b>                                                                            |                                                                                   |
| Parliamentary Questions                                                                           | Online                                                                            |
| Oireachtas Reports                                                                                |                                                                                   |
